# Supplementary material for: Chemically activated growth of CuO nanostructures for flexible cold cathode emission
Source: Royal Society of Chemistry journal article supplement (doi:10.1039/c6ce00335d), 2016-01-01
Supplement: c6ce00335d1.pdf [file c6ce00335d1.pdf]

## Electronic Supplementary Information (ESI)

### Chemically activated growth of CuO nanostructures for flexible cold cathode emission

Karamjyoti Panigrahi, Swati Das, Subhajit Saha, Biswajit Das, Dipayan Sen, Promita Howli and  
Kalyan Kumar Chattopadhyay\*

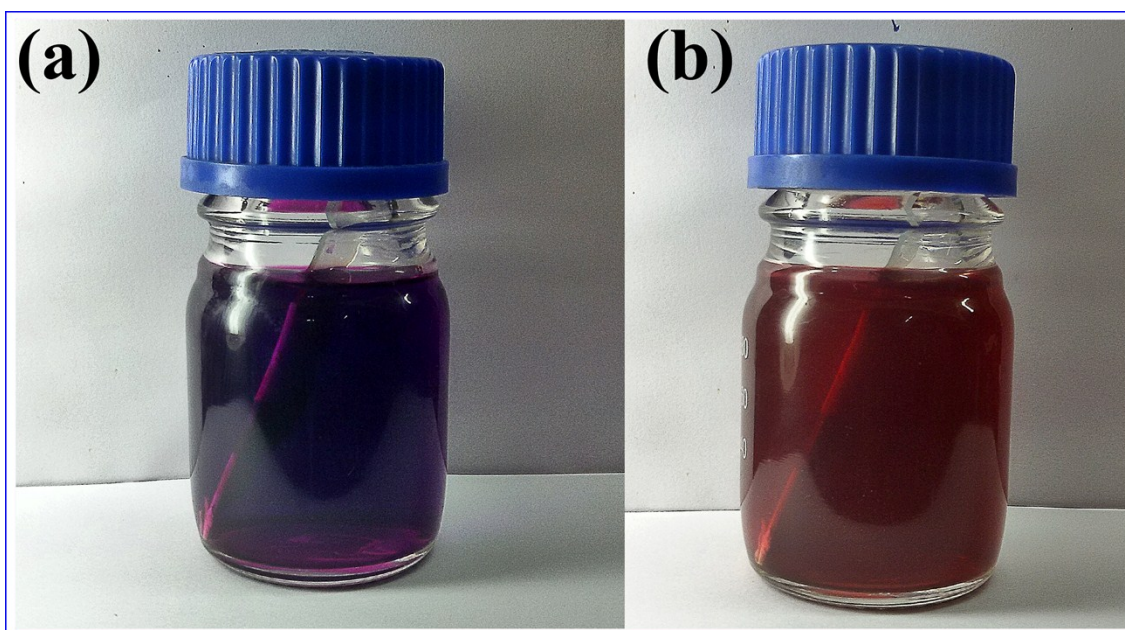

**Figure S1:** Demonstration of colour transformation of the activation solution from violet to dark brown for the confirmation of  $\text{MnO}_2$  formation. (a) Just after starting the reaction (b) after completion of the activation process.

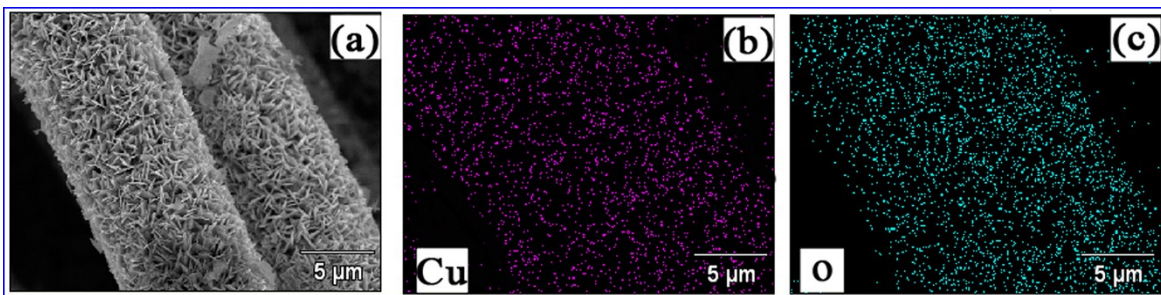

**Figure S2:** EDX elemental mapping of CuO nanostructure in support of uniform distribution of Cu and O inside the sample.

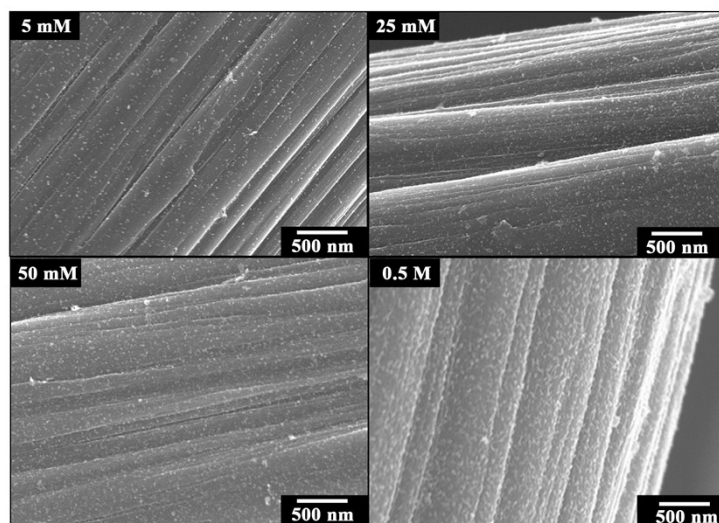

**Figure S3:** FESEM images of activated CFs prepared from various KMnO<sub>4</sub> concentration.
